# Supplementary material for: Molecular basis for bipartite recognition of histone H3 by the PZP domain of PHF14
Source: PubMed Central journal article supplement — Nucleic Acids Res. 2021 Aug 7;49(15):8961–73. doi: 10.1093/nar/gkab670 (PMC8421203; doi:10.1093/nar/gkab670), 2021-08-07
Supplement: gkab670_supplemental_file.pdf [file gkab670_supplemental_file.pdf]

## SUPPLEMENTARY DATA

### **Molecular basis for bipartite recognition of histone H3 by the PZP domain of PHF14**

Shuangping Zheng,<sup>1</sup> Yucong Bi,<sup>1</sup> Haining Chen,<sup>1</sup> Bo Gong,<sup>2</sup> Shunji Jia,<sup>2</sup> and Haitao Li<sup>1,3,\*</sup>

<sup>1</sup>MOE Key Laboratory of Protein Sciences, Beijing Advanced Innovation Center for Structural Biology, Beijing Frontier Research Center for Biological Structure, Department of Basic Medical Sciences, School of Medicine, Tsinghua University, Beijing 100084, China

<sup>2</sup>State Key Laboratory of Biomembrane and Membrane Engineering, School of Life Sciences, Tsinghua University, Beijing 100084, China

<sup>3</sup>Tsinghua-Peking Center for Life Sciences, Beijing 100084, China

\* To whom correspondence should be addressed: [lht@tsinghua.edu.cn](mailto:lht@tsinghua.edu.cn)

This file contains:

Supplementary\_Figures S1-6

Supplementary\_Table S1-3

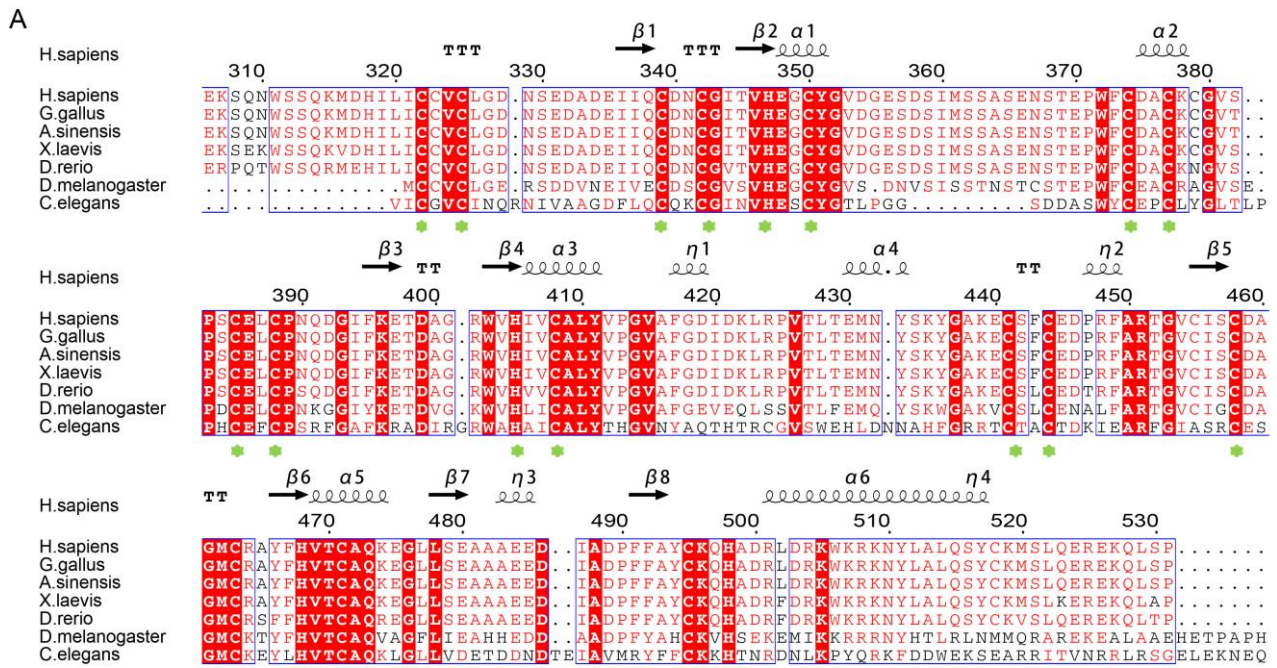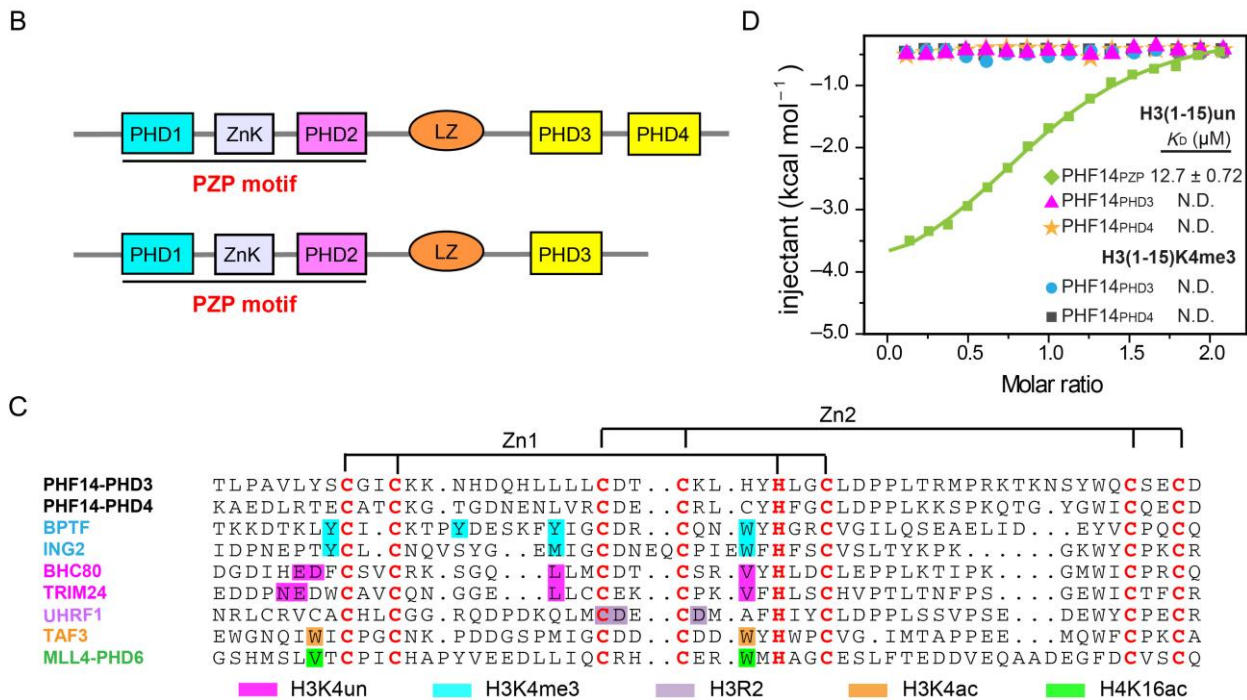

**Supplementary Figure S1.** PHF14<sub>PZP</sub> is an unmodified histone H3<sub>(1-34)</sub> reader. (A) Sequence alignment of PHF14<sub>PZP</sub> orthologues. (B) Domain architectures of two isoforms of PHF14. (C) Sequence alignment of PHF14<sub>PHD3</sub>, PHF14<sub>PHD4</sub> and other PHD-containing histone reader proteins. Key residues recognizing H3K4me3, H3K4un, H3R2un, H3K4ac and H4K16ac are shaded in cyan, magenta, purple, orange and green background, respectively. (D) ITC fitting curves of PHF14<sub>PHD3</sub>, PHF14<sub>PHD4</sub> and PHF14<sub>PZP</sub> titrated with unmodified H3<sub>(1-15)</sub> and H3<sub>(1-15)</sub> K4me3 peptides, respectively.





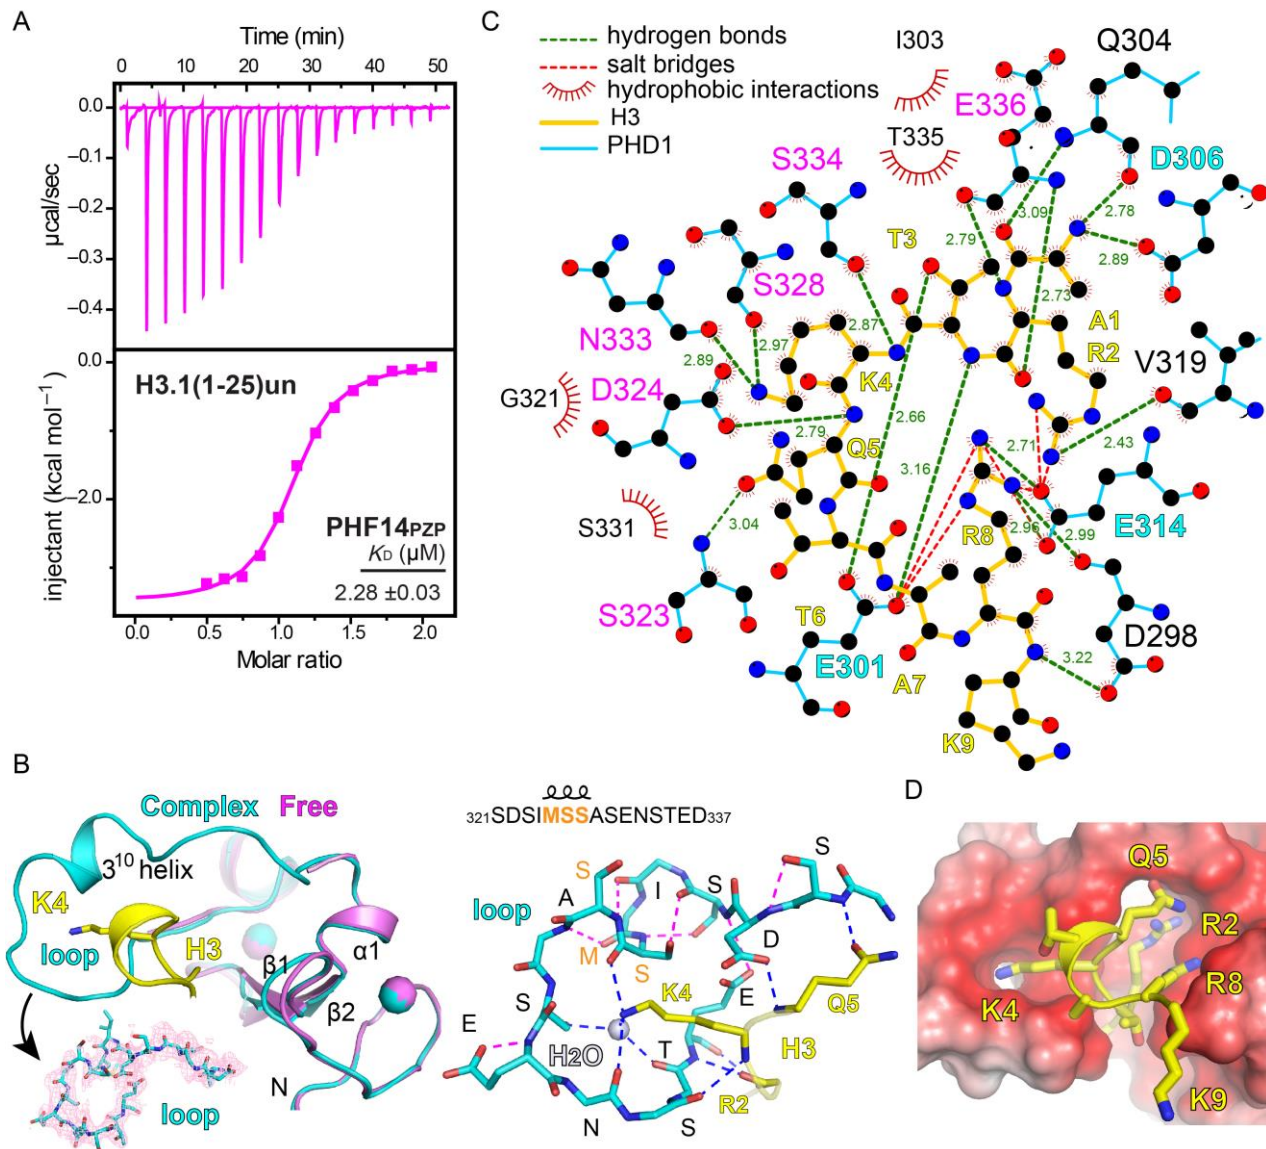

**Supplementary Figure S3.** Interaction analyses for H3<sub>(1-25)</sub> readout by PHF14<sub>PZP</sub>. (A) ITC titration and fitting curves of H3<sub>(1-25)</sub>-PHF14<sub>PZP</sub> interaction pair. (B) Left, structural alignment of free PHF14<sub>PZP</sub> (magenta) and H3<sub>(1-25)</sub>-PHF14<sub>PZP</sub> complex (yellow/cyan). 2Fo-Fc omit map of the reordered insertion loop is contoured at 0.5  $\sigma$  level and shown as pink meshes; Right, hydrogen binding network of between H3 (yellow) and the insertion loop (cyan). Bluewhite sphere, water; magenta dashes, intra-chain hydrogen bonds within the insertion loop; blue dashes, inter-chain hydrogen bonds. Note the  $3^{10}$  helix ( $\eta$ ) formation of the “MSS” motif of the insertion loop. (C) LIGPLOT diagram listing critical contacts between PHF14<sub>PZP</sub> and the modelled H3<sub>(1-9)</sub> peptide. (D) Intimate engagement of H3<sub>(1-9)</sub> by an acidic cleft of PHD1 of PHF14<sub>PZP</sub>. The electrostatic potential surface is colored as a spectrum from blue ( $\leq 5$  kT/e) to red ( $\geq 5$  kT/e). Side chains of H3 R2, K4, Q5, R8 and K9 are shown as yellow sticks.

## Shuangping\_SuppFig.4

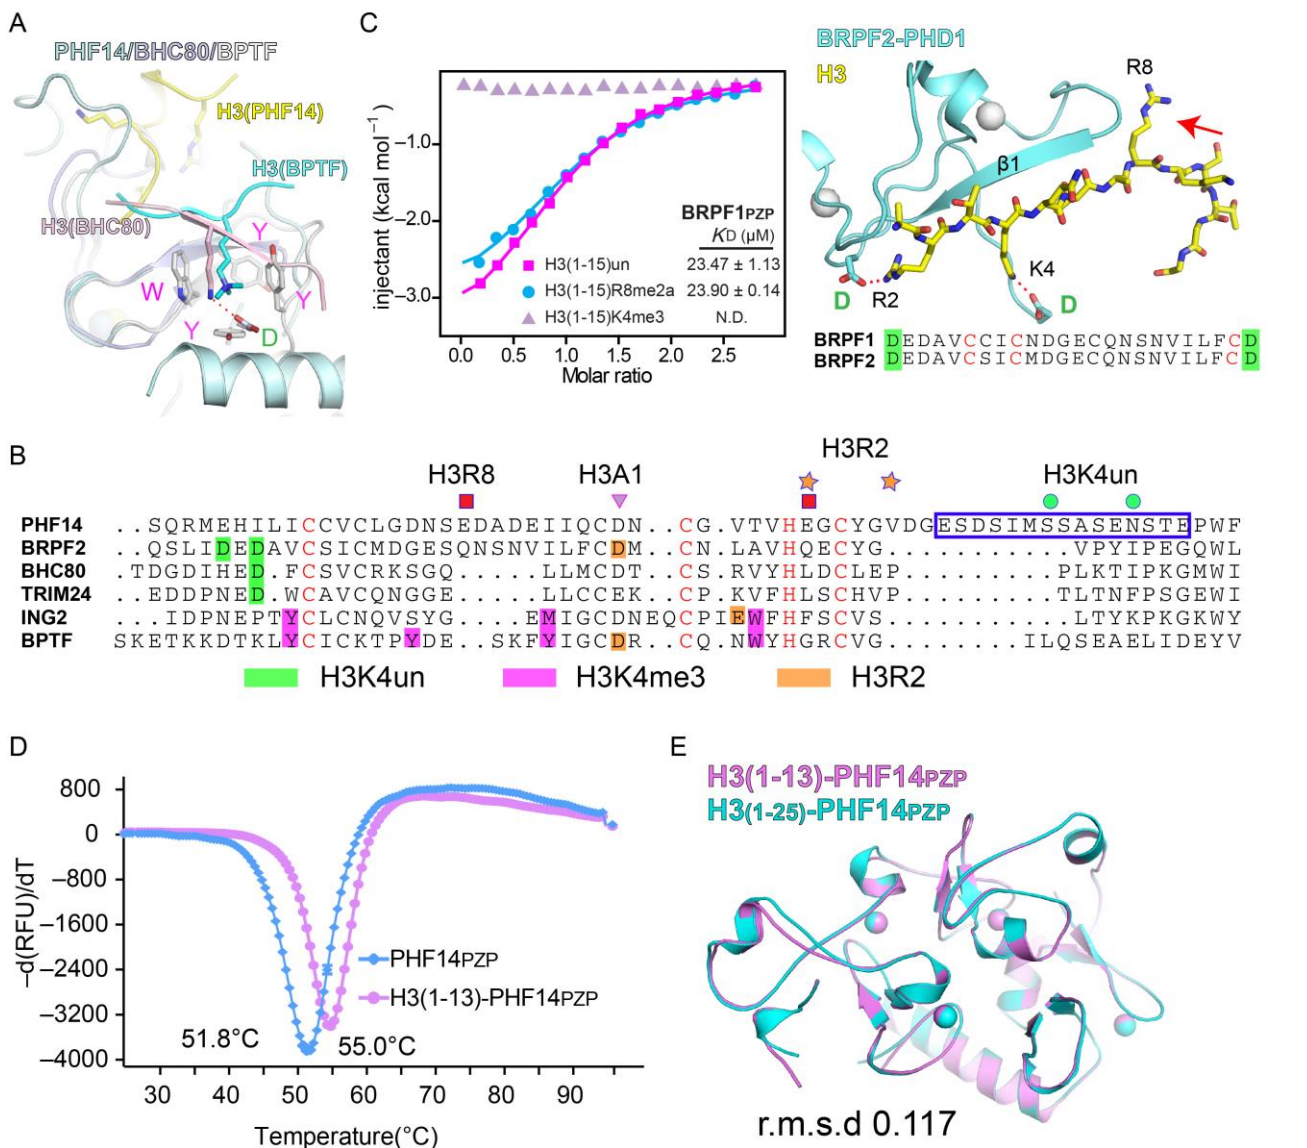

**Supplementary Figure S4.** (A) Structural alignment of H3-bound PHD fingers of PHF14 (pale cyan), BHC80 (blue white) and BPTF (grey). Key residues of BHC80 and BPTF responsible for H3K4un and H3K4me3 recognition are highlighted green and magenta, respectively. (B) Sequence alignment of representative H3-binding PHD fingers. Key residues responsible for H3R2, H3K4un and H3K4me3 recognition of BRPF2, BHC80, TRIM24, ING2, and BPTF are shaded in orange, green and magenta, respectively. Orange stars, green circles, red squares and violet triangles denote H3R2, H3K4, H3R8 and H3A1 binding residues of PHF14, respectively. (C) ITC fitting curves of BRPF1 titrated with H3 peptides(left); Structure analysis of H3<sub>(1-13)</sub> recognition by BRPF2<sub>PHD1</sub> (PDB, 2L43) and sequence alignment of BRPF1<sub>PHD1</sub> and BRPF2<sub>PHD1</sub>(right). Key residues are shown as sticks. (D) TSA melting curves of PHF14<sub>PZP</sub> and H3(1-13)-PHF14<sub>PZP</sub>. (E) Structural alignment of H3(1-13)-PHF14<sub>PZP</sub> (violet) and H3<sub>(1-25)</sub>-PHF14<sub>PZP</sub> complex(cyan).

A

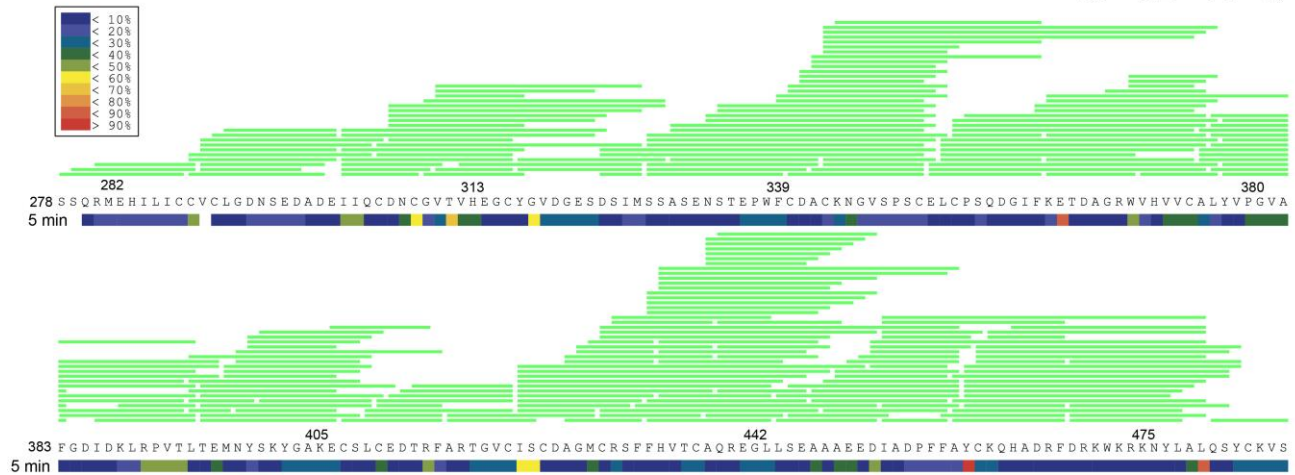

B

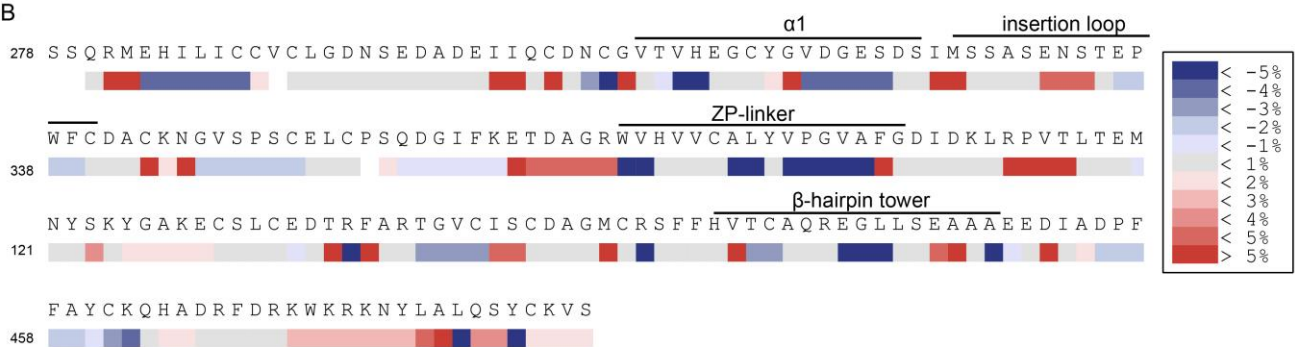

C

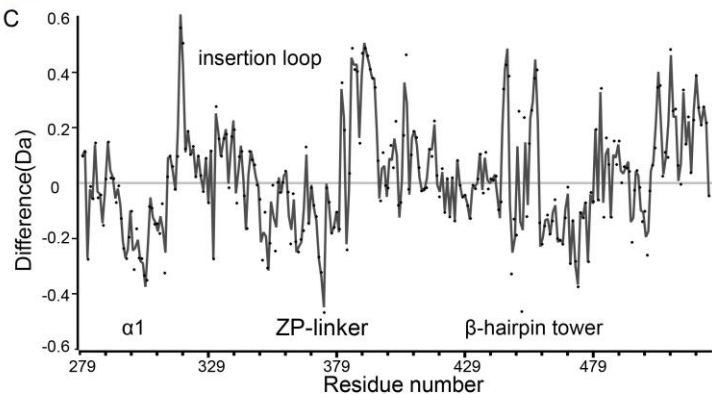

**Supplementary Figure S5.** HDX-MS analyses of H3<sub>(1-34)</sub> recognition by PHF14<sub>PZP</sub>. (A) Sequence coverage of peptic digested PHF14<sub>PZP</sub>. (B) Deuterium uptake profiles. Incorporation of deuterium at 5 min are indicated by color-coded blocks underlining the amino acid sequence. The color legend shows the deuterium uptake levels. Regions not covered are colored grey. (C) Difference plot of the HDX-MS data from PHF14<sub>PZP</sub> in the presence and absence of H3<sub>(1-34)</sub>. Negative values mean less exchange and more protection upon and positive values mean more exchange and less protection upon.



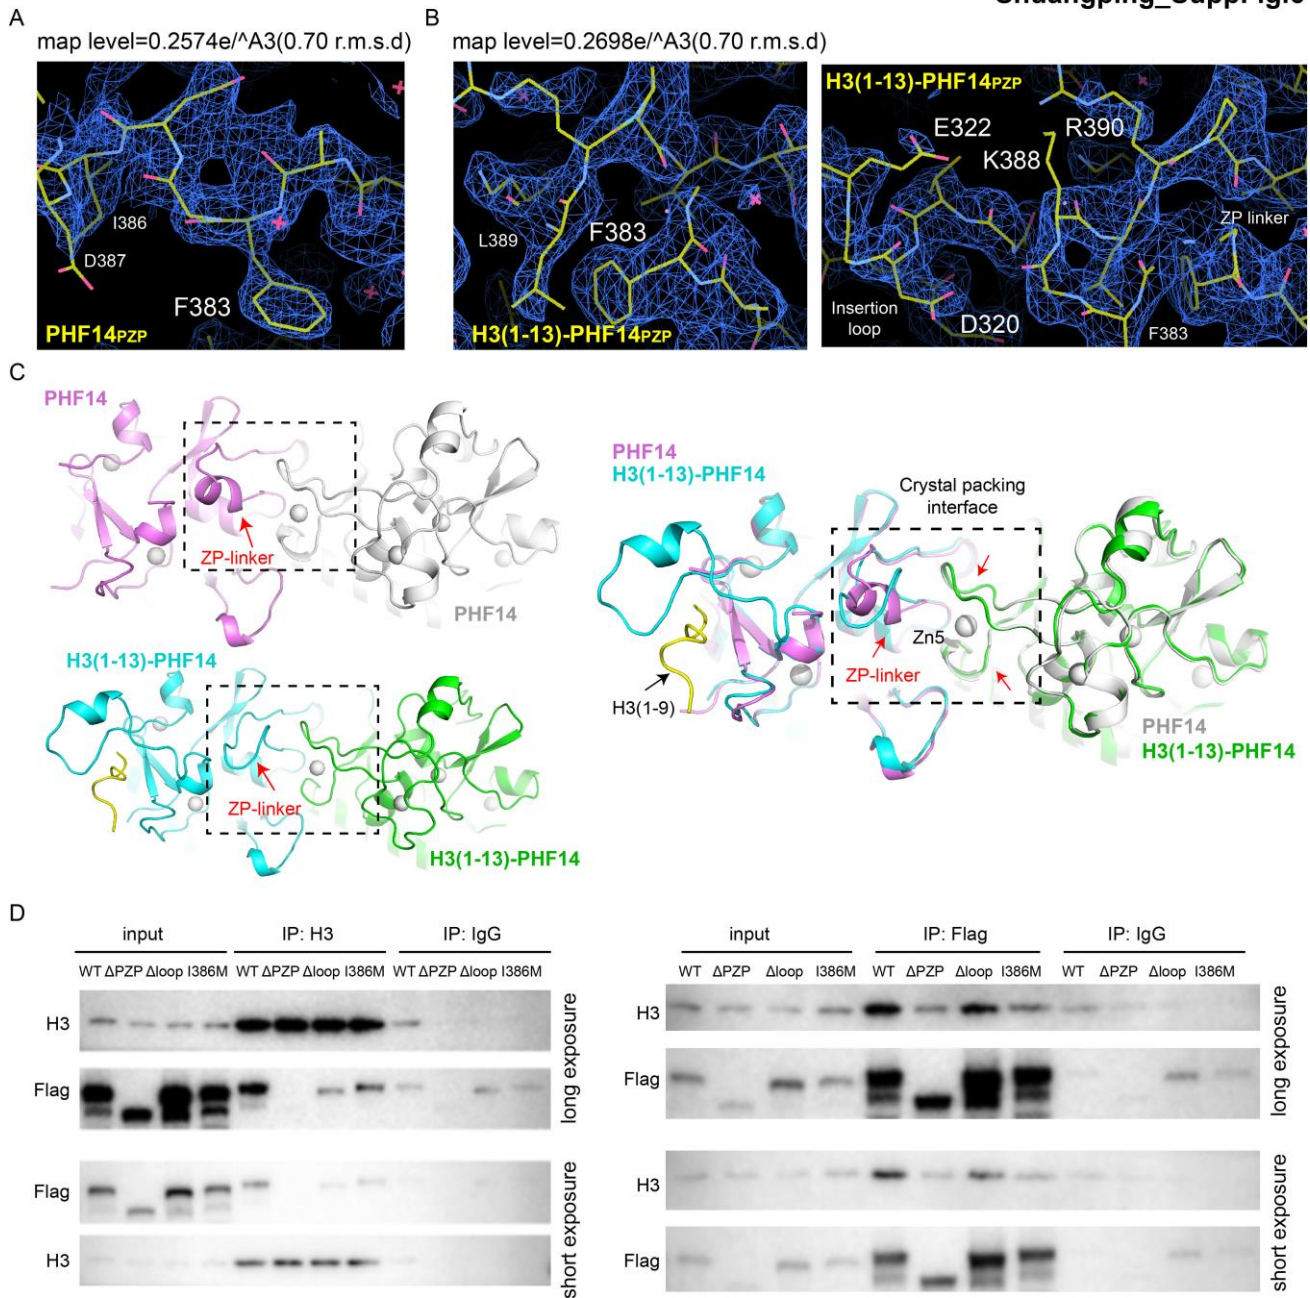

**Supplementary Figure S6.** (A) The 2fo-fc electron density around F383 residue in free PHF14<sub>PZP</sub> structure. (B) The 2fo-fc electron density around F383 residue (left) and D320, E322, K388 and R390 residues (right) in H3(1-13)-PHF14<sub>PZP</sub> complex structure. Map level is indicated in each panel. (C) Crystal packing analysis of PHF14<sub>PZP</sub> (violet ribbon-grey ribbon) and H3(1-13)-PHF14<sub>PZP</sub> (cyan ribbon-green ribbon). Crystal packing presentation of PHF14<sub>PZP</sub> and H3(1-13)-PHF14<sub>PZP</sub> (left) and structural alignment of PHF14<sub>PZP</sub> and H3(1-13)-PHF14<sub>PZP</sub> (right). Black dotted bordered rectangle indicate the crystal packing interface. ZP-linker region and other corresponding region have been labelled (D) Uncropped images of Co-IP assays under long and short exposure time.

**Supplementary Table S1.** The list of peptides

| <b>Peptides</b>   | <b>Sequence</b>                        |
|-------------------|----------------------------------------|
| H3.1(1-34)un      | ARTKQTARKSTGGKAPRKQLATKAARKSAPATGG-NH2 |
| H3.3(1-34)un      | ARTKQTARKSTGGKAPRKQLATKAARKSAPSTGG-NH2 |
| H3.1(1-25)un      | ARTKQTARKSTGGKAPRKQLATKAA-NH2          |
| H3 (1-15)un       | ARTKQTARKSTGGKA-NH2                    |
| H3 (1-15)R2me2a   | AR(me2a)TKQTARKSTGGKA-NH2              |
| H3 (1-15)R2me2s   | AR(me2s)TKQTARKSTGGKA-NH2              |
| H3 (1-15)T3ph     | ART(ph)KQTARKSTGGKA-NH2                |
| H3 (1-15)K4me3    | ARTK(me3)QTARKSTGGKA-NH2               |
| H3 (1-15)R8me2a   | ARTKQTAR(me2a)KSTGGKA-NH2              |
| H3 (1-15)R8me2s   | ARTKQTAR (me2s)KSTGGKA-NH2             |
| H3 (1-15)K9me3    | ARTKQTARK(me3)STGGKA-NH2               |
| H3.1(14-34)un     | KAPRKQLATKAARKSAPATGG-NH2              |
| H3.3(14-34)un     | KAPRKQLATKAARKSAPSTGG-NH2              |
| H3.3(14-34)K18ac  | KAPRK(ac)QLATKAARKSAPSTGG-NH2          |
| H3.3(14-34)K23ac  | KAPRKQLATK(ac)AARKSAPSTGG-NH2          |
| H3.3(14-34)K27ac  | KAPRKQLATKAARK(ac)SAPSTGG-NH2          |
| H3.3(14-34)K27me3 | KAPRKQLATKAARK(me3)SAPSTGG-NH2         |
| H3 (20-28)un      | LATKAARKS                              |



**Supplementary Table S2.** Thermodynamic parameters for ITC experiments

| Protein                                            | Peptide                                  | $\Delta H$ (cal/mol) | $-\Delta S$ (cal/mol) | $K_a$ ( $M^{-1}$ ) | N             | $\chi^2/DOF$  |
|----------------------------------------------------|------------------------------------------|----------------------|-----------------------|--------------------|---------------|---------------|
| <b>PHF14<sub>PZP</sub></b>                         | H3.3(1-34)un                             | -4451±64.48          | -4,651.14             | 4.71E6±1.02E6      | 1.06±0.00877  | 1.007E4       |
|                                                    | H3.3(1-34)un                             | -4681±173.3          | -4,472.25             | 5.11E6±1.97E6      | 1.03±0.0128   | 1.586E4       |
|                                                    | H3.1(1-34)un                             | -4435±42.66          | -5,038.735            | 8.60E6±1.31E6      | 0.963±0.00430 | 3829          |
|                                                    | H3.1(1-34)un                             | -4538±94.29          | -4,561.695            | 4.65E6±2.14E6      | 0.965±0.0114  | 4.711E4       |
|                                                    | H3.1(1-34)un                             | -3635±93.58          | -5,575.405            | 5.66E6±2.43E6      | 1.05±0.0134   | 2.732E4       |
|                                                    | H3(1-15)un                               | -4744±87.16          | -1899.215             | 7.38E4±3.96E3      | 1.01±0.0114   | 750.1         |
|                                                    | H3(1-15)un                               | -5387±145.1          | -1419.194             | 9.74E4±6.26E3      | 1.05±0.0159   | 1327          |
|                                                    | H3(1-15)K9me3                            | -4322±300.7          | -1,347.638            | 1.43E4±1.78E3      | 1.06±0.0395   | 990.4         |
|                                                    | H3(1-15) K9me3                           | -4200±234.1          | -1,420.522            | 1.20E4±1.33E3      | 1.00±0.0245   | 1000.5        |
|                                                    | H3(1-25)un                               | -3508±61.31          | -4,203.915            | 4.42E5±5.22E4      | 1.07±0.00976  | 3956          |
|                                                    | H3(1-25)un                               | -3385±95.83          | -4,293.36             | 4.33E5±9.02E4      | 1.03±0.0164   | 1.441E4       |
|                                                    | H3.1(14-34)un                            | -1755±103.0          | -5,992.815            | 4.69E5±1.26E5      | 0.974±0.0180  | 1838          |
|                                                    | H3.1(14-34)un                            | -1639±48.95          | -6,082.26             | 4.66E5±1.12E5      | 1.05±0.0138   | 2894          |
|                                                    | H3.3(14-34)un                            | -1384±76.79          | -6,350.595            | 4.69E5±1.31E5      | 0.978±0.0239  | 2300          |
|                                                    | H3.3(14-34)un                            | -1413±95.71          | -6,231.335            | 3.96E5±8.97E4      | 1.09±0.0279   | 1127          |
|                                                    | <b>H3(1-13)-<br/>PHF14<sub>PZP</sub></b> | H3.1(14-34)un        | -3785±51.75           | -3846              | 3.98E5±3.67E4 | 0.974±0.00754 |
| H3.1(14-34)un                                      |                                          | -3773±48.87          | -4,114.47             | 6.14E5±5.50E4      | 0.959±0.00715 | 2653          |
| H3.3(14-34)un                                      |                                          | -3579±81.91          | -4,233.73             | 5.39E5±1.00E5      | 1.01±0.0133   | 1.070E4       |
| H3.3(14-34)un                                      |                                          | -3627±107.0          | -4174.1               | 5.13E5±1.03E5      | 1.00±0.0151   | 1.122E4       |
| H3.3(14-34)un                                      |                                          | -3047±36.83          | -4830                 | 5.93E5±7.12E4      | 1.09±0.00851  | 3898          |
| H3.3(14-34)K18ac                                   |                                          | -2603±61.13          | -4,092.19             | 7.86E4±7.56E3      | 1.06±0.0144   | 827.5         |
| H3.3(14-34)K18ac                                   |                                          | -2634±108.0          | -4,054.84             | 8.06E4±1.34E4      | 0.877±0.0235  | 3102          |
| H3.3(14-34)K27ac                                   |                                          | -3550±65.69          | -3,935.58             | 3.09E5±4.50E4      | 1.07±0.0139   | 9005          |
| H3.3(14-34)K27ac                                   |                                          | -3459±120.2          | -3,935.58             | 2.65E5±5.88E4      | 0.993±0.0200  | 1.162E4       |
| H3.3(14-34)K27me3                                  |                                          | -3952±67.66          | -3,846.135            | 5.08E5±6.08E4      | 1.01±0.00912  | 5195          |
| H3.3(14-34)K27me3                                  |                                          | -2894±87.97          | -4,859.845            | 4.85E5±1.32E5      | 0.842±0.0185  | 1.252E4       |
| <b>H3(1-13)-<br/>PHF14<sub>PZP</sub>-E322A</b>     |                                          | H3.3(14-34)un        | -2074±33.28           | -5,217.625         | 2.19E5±2.34E4 | 1.03±0.0113   |
| <b>H3(1-13)-<br/>PHF14<sub>PZP</sub>-E320A</b>     | H3.3(14-34)un                            | -1143±52.65          | -6,350.595            | 3.19E5±1.24E5      | 1.08±0.0347   | 7317          |
| <b>PHF14<sub>PZP</sub>-<math>\Delta</math>loop</b> | H3.3(14-34)un                            | -1127±61.96          | -6,440.04             | 2.87E5±7.18E4      | 1.10±0.0220   | 1676          |
|                                                    | H3.3(14-34)un                            | -1160±39.96          | -6,469.855            | 3.88E5±8.00E4      | 0.973±0.0170  | 959.0         |
| <b>PHF14<sub>PZP</sub>I386M<br/>V378M</b>          | H3(1-34)un                               | -1415±52.79          | -6,141.89             | 3.48E5±8.02E4      | 1.04±0.0200   | 2907          |
|                                                    | H3(1-34)un                               | -1464±89.03          | -6,201.52             | 4.12E5±1.04E5      | 1.10±0.0286   | 1993          |
| <b>AF10<sub>PZP</sub></b>                          | H3.3(1-34)un                             | -8998±66.32          | -533.6885             | 1.60E6±1.81E5      | 1.07±0.00499  | 2.091E4       |
|                                                    | H3.3(1-34)un                             | -8381±95.62          | -94.51                | 1.63E6±2.70E5      | 1.07±0.00731  | 3.862E4       |
|                                                    | H3(1-15)un                               | -6231±490.0          | -354.7985             | 2.03E4±3.07E3      | 1.00±0.0512   | 7663          |
|                                                    | H3(1-15)un                               | -7069±544.2          | -1,144.896            | 2.19E4±3.39E3      | 0.965±0.0469  | 1.034E4       |
|                                                    | H3.3(14-34)un                            | -4243±38.94          | -3,100.76             | 2.40E5±1.57E4      | 0.983±0.00665 | 2359          |
|                                                    | H3.3(14-34)un                            | -4185±32.13          | -3,100.76             | 2.23E5±1.20E4      | 0.986±0.00554 | 1642          |
|                                                    | H3(21-28)un                              | -3363±171.1          | -2,838.388            | 3.50E4±4.90E3      | 1.02±0.0339   | 3368          |
|                                                    | H3(21-28)un                              | -3288±225.2          | -2,832.425            | 3.06E4±5.55E3      | 1.02±0.0453   | 3822          |
|                                                    | H3.1(14-34)un                            | -3293±58.90          | -3,965.39             | 2.09E5±2.51E4      | 1.01±0.0133   | 4460          |
|                                                    | H3.1(14-34)un                            | -3103±73.16          | -4,144.285            | 2.03E5±2.87E4      | 1.01±0.0171   | 5060          |
|                                                    | H3.3(14-34)K23a                          | -3768±127.4          | -2,528.312            | 4.13E4±3.79E3      | 0.990±0.0231  | 2224          |
|                                                    | H3.3(14-34)K23ac                         | -3352±82.64          | -2,921.87             | 3.97E4±2.66E3      | 0.965±0.0169  | 898.6         |

**BRPF1<sub>PZP</sub>**

|                |             |             |               |               |       |
|----------------|-------------|-------------|---------------|---------------|-------|
| H3.3(1-34)un   | -3953±58.04 | -3,130.575  | 1.56E5±1.23E4 | 1.02J±0.00992 | 2821  |
| H3.3(1-34)un   | -3424±54.90 | -3,637.43   | 1.47E5±1.10E4 | 0.923±0.00971 | 1830  |
| H3(1-15)un     | -3944±67.48 | -2,352.4035 | 4.12E4±2.12E3 | 1.04±0.0122   | 802.2 |
| H3(1-15)un     | -3998±155.2 | -2,337.496  | 4.41E4±5.84E3 | 1.05±0.0273   | 4686  |
| H3(1-15)R8me2a | -3704±57.58 | -2,602.8495 | 4.20E4±1.85E3 | 0.955±0.0104  | 494.0 |
| H3(1-15)R8me2a | -3650±20.32 | -2,690.6354 | 4.16E4±5.65E3 | 0.980±0.0105  | 1028  |

**Supplementary Table S3.** Data collection and refinement statistics

|                                                     | Zebrafish PHF14 <sub>PZP</sub> | PHF14 <sub>PZP</sub> &H3 <sub>(1-25)</sub> | H3(1-13)-PHF14 <sub>PZP</sub> |
|-----------------------------------------------------|--------------------------------|--------------------------------------------|-------------------------------|
| <b>Data collection</b>                              | Native                         | Native                                     | Native                        |
| Space group                                         | P2 <sub>1</sub>                | C222 <sub>1</sub>                          | C222 <sub>1</sub>             |
| Wavelength (Å)                                      | 1.2818                         | 0.9792                                     | 1.2818                        |
| Cell dimensions                                     |                                |                                            |                               |
| <i>a, b, c</i> (Å)                                  | 42.2, 41.9, 52.9               | 41.9, 151.0, 81.8                          | 41.8, 150.4, 81.4             |
| $\alpha, \beta, \gamma$ (°)                         | 90, 99.0, 90                   | 90, 90, 90                                 | 90, 90, 90                    |
| Resolution (Å)                                      | 50-1.85 (1.88-1.85)            | 50-2.1 (2.14-2.10)                         | 50-2.0 (2.05-2.00)            |
| No. of unique reflections                           | 29,578 (1488)#*                | 15,363 (748)                               | 16,737 (1282)                 |
| <i>R</i> <sub>sym</sub> (%)                         | 7.3 (72.5)                     | 127.5 (88.9)                               | 12.5 (91.4)                   |
| <i>I</i> / $\sigma$ ( <i>I</i> )                    | 20.0 (1.9)                     | 30.6 (2.3)                                 | 15.5 (3.6)                    |
| Completeness (%)                                    | 95.7 (95.4)                    | 99.8 (99.9)                                | 93.9 (99.6)                   |
| Redundancy                                          | 2.3 (2.3)                      | 11.8 (8.7)                                 | 13.2 (12.9)                   |
| <b>Refinement (F&gt;0)</b>                          |                                |                                            |                               |
| Resolution (Å)                                      | 41.7-1.855                     | 32.2-2.1                                   | 40.7-2.0                      |
| No. reflections                                     | 29,554                         | 15,340                                     | 16,713                        |
| <i>R</i> <sub>work</sub> / <i>R</i> <sub>free</sub> | 17.4/22.5                      | 16.5/20.4                                  | 17.7/21.2                     |
| No. atoms                                           |                                |                                            |                               |
| Protein                                             | 1433                           | 1552                                       | 1542                          |
| Peptide                                             | -                              | 73                                         | 73                            |
| Zn/Mg/Ca/EG                                         | 5/1/-/1                        | 5/-/2/-                                    | 5/-/2/-                       |
| Water                                               | 92                             | 88                                         | 116                           |
| <i>B</i> -factors                                   |                                |                                            |                               |
| Protein                                             | 45.7                           | 58.0                                       | 47.4                          |
| Peptide                                             | -                              | 91.8                                       | 77.6                          |
| Zn/Mg/Ca/EG                                         | 37.6/33.0/-/47.8               | 38.4/-/53.0/-                              | 31.7/-/41.6/-                 |
| Water                                               | 44.9                           | 46.8                                       | 42.4                          |
| R.m.s. deviations                                   |                                |                                            |                               |
| Bond lengths (Å)                                    | 0.004                          | 0.006                                      | 0.006                         |
| Bond angles (°)                                     | 0.644                          | 0.732                                      | 0.765                         |
| Ramachandran plot (%)                               |                                |                                            |                               |
| Favored                                             | 97.8                           | 93.0                                       | 90.3                          |
| Allowed                                             | 2.2                            | 7.0                                        | 9.7                           |
| Outliers                                            | 0                              | 0                                          | 0                             |

#This data set contains anomalous signal

\*Outmost resolution shell in parenthesis
